# Supplementary material for: Modeling of the Bioactivation of an Organic Nitrate by a Thiol to Form a Thionitrate Intermediate
Source: MDPI journal article supplement (doi:10.3390/molecules22010019), 2016-12-25
Supplement: s1 [file s1]

# Supplementary Materials: Modeling of the Bioactivation of an Organic Nitrate by a Thiol to Form a Thionitrate Intermediate

Tsukasa Sano, Keiichi Shimada, Yohei Aoki, Takayuki Kawashima, Shohei Sase and Kei Goto

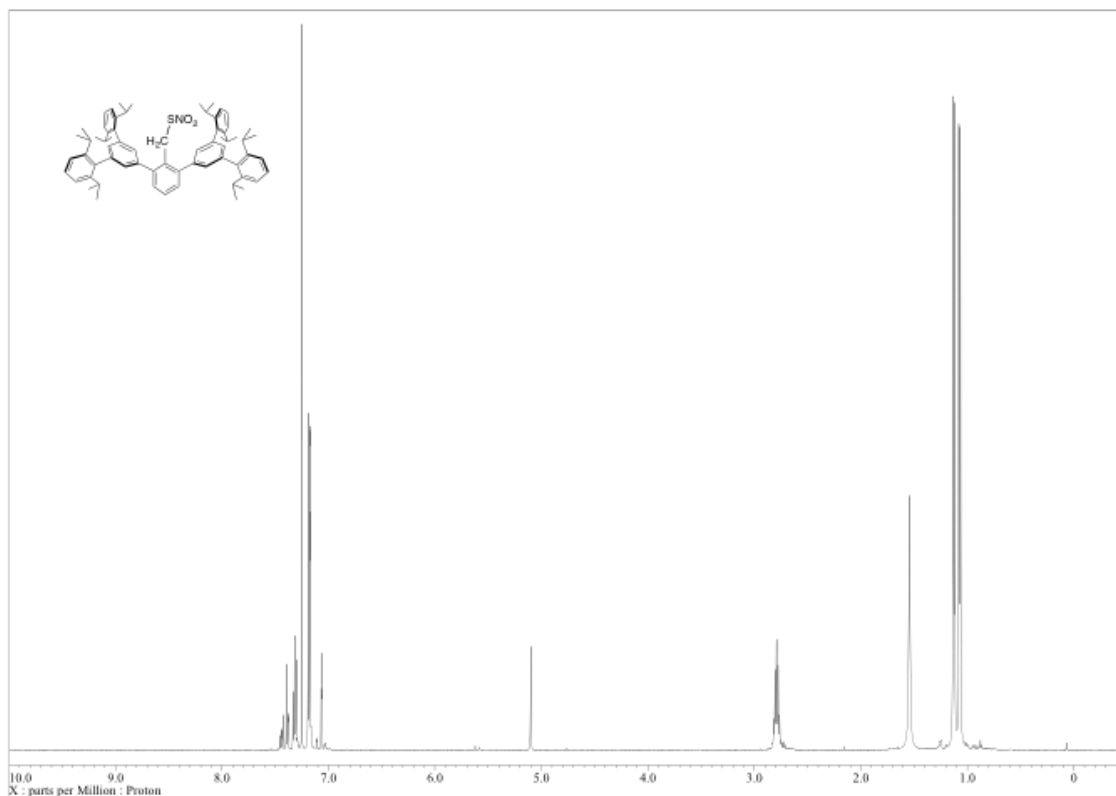

Figure S1. <sup>1</sup>H NMR (500 MHz) spectrum of compound 6 in CDCl<sub>3</sub>.

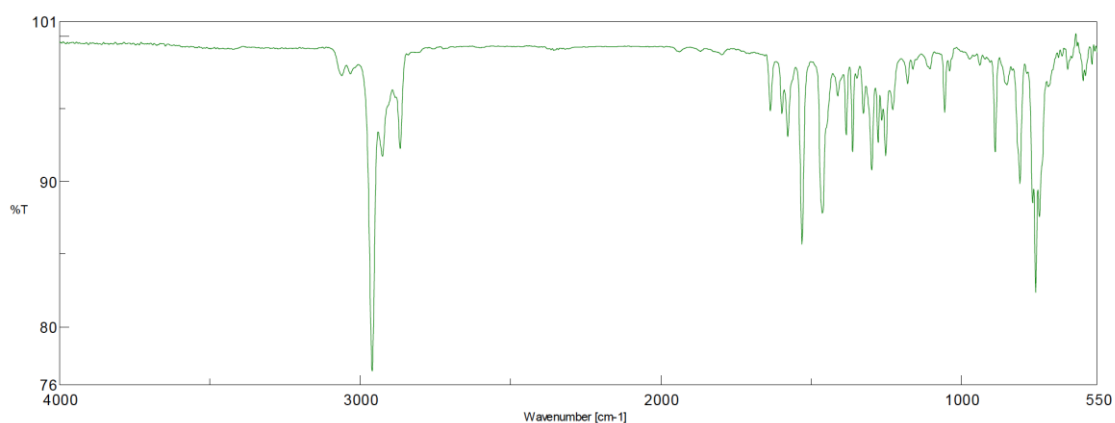

Figure S2. IR (ATR) spectrum of compound 6.
